# Supplementary material for: Molecular development of chondrichthyan claspers and the evolution of copulatory organs
Source: PubMed Central journal article supplement (PMC4403318; doi:10.1038/ncomms7698), 2015-04-14
Supplement: ncomms7698-s1.pdf [file ncomms7698-s1.pdf]

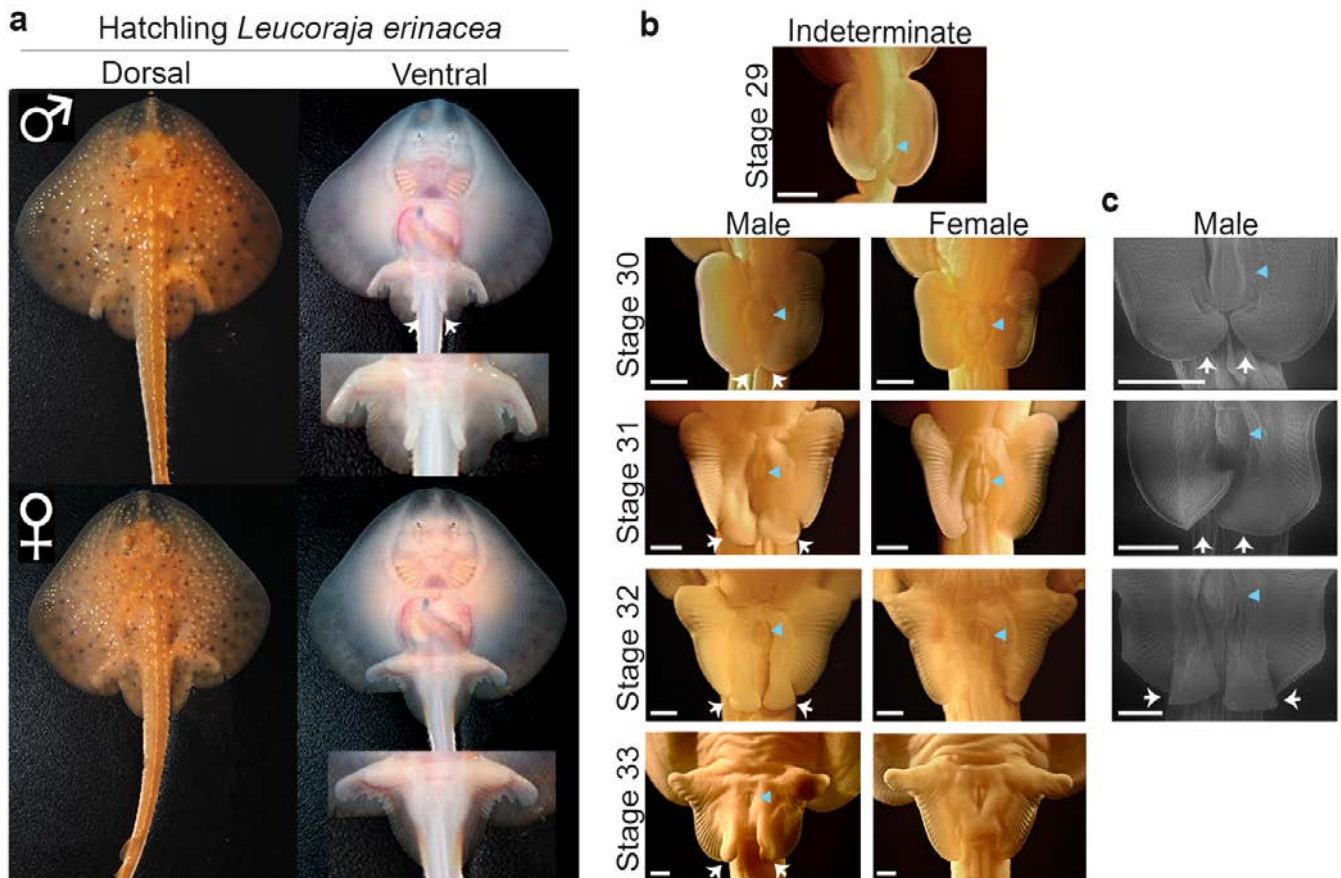

**Supplementary Figure 1: Embryonic development of claspers in *L. erinacea* (little skate).** **a**, Gross morphology of male and female hatchlings. **b**, Bouin's-fixed embryos depicting the sexually dimorphic pelvic fin development in male and female skates. White arrows mark the claspers; blue arrows mark the cloacal opening. **c**, Scanning electron micrographs showing clasper development (white arrows) in male pelvic fins at stages 30-32. In all panels the error bar represents 500  $\mu\text{m}$ .

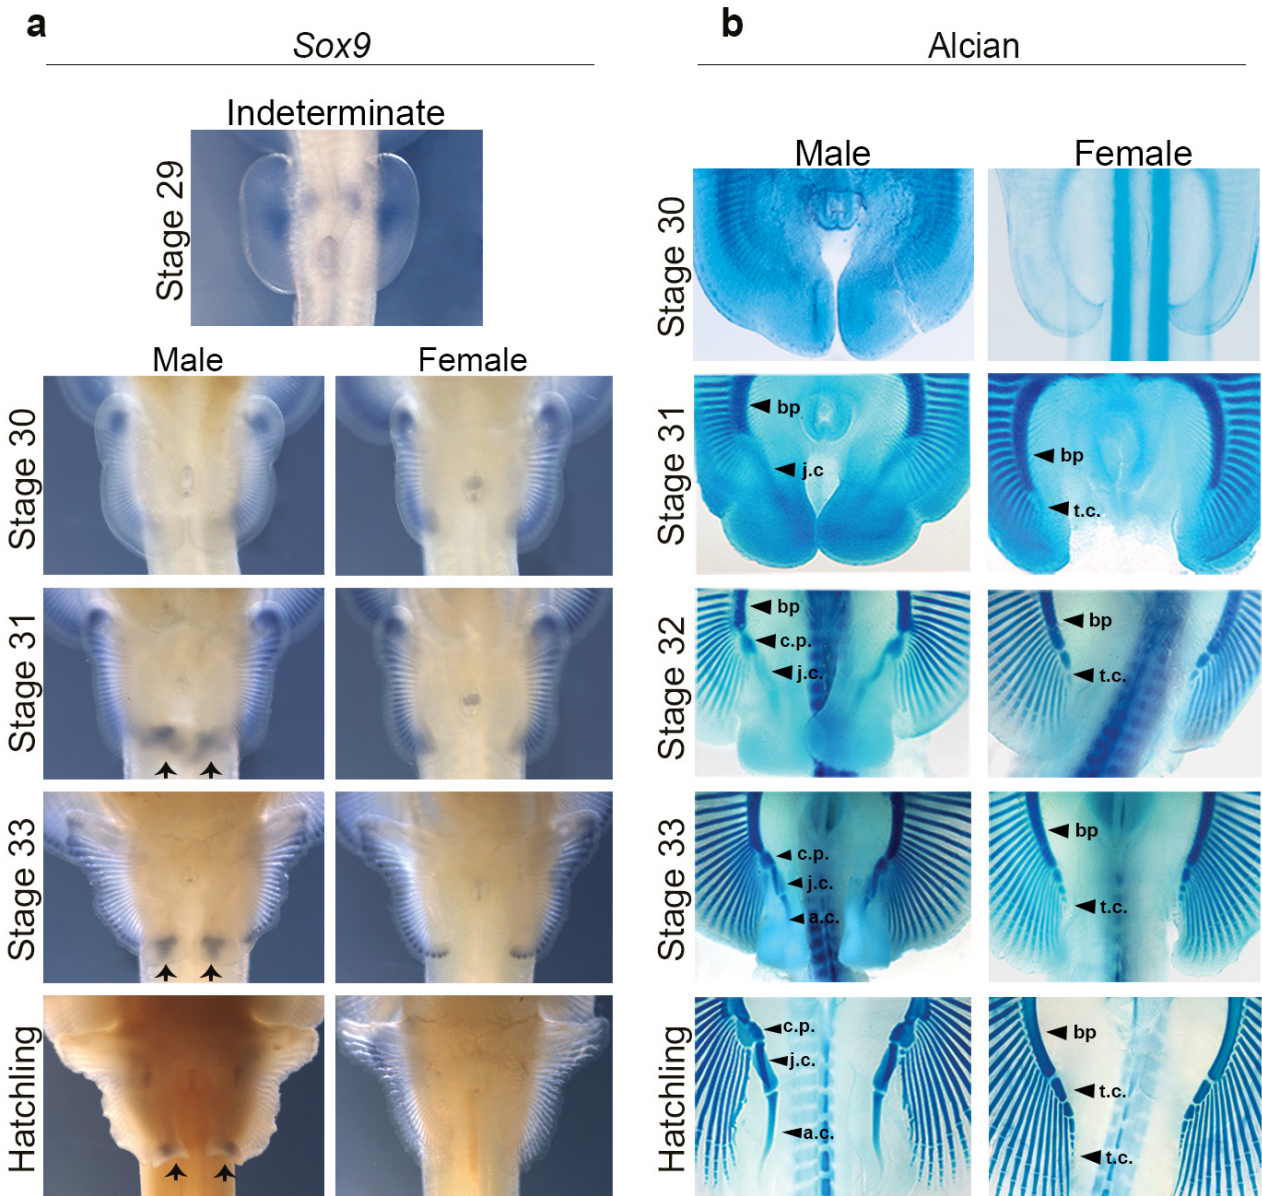

**Supplementary Figure 2: Sexually dimorphic development of the pelvic fin skeleton.** *a*, *In situ* hybridization of *Sox9* in male and female pelvic fins throughout clasper development. Beginning at stage 31, an extended posterior expression domain is apparent in male fins; posterior expression is still detected in hatchling animals. *b*, Alcian blue staining reveals differences in the development of the post-basipterygial cartilages between male and female fins. The posterior skeletal elements of males and females are labeled as follows: bp=basipterygium, t.c.=terminal cartilages, c.p.=covering plate, j.c.=junctional cartilages, a.c.=axial cartilage.

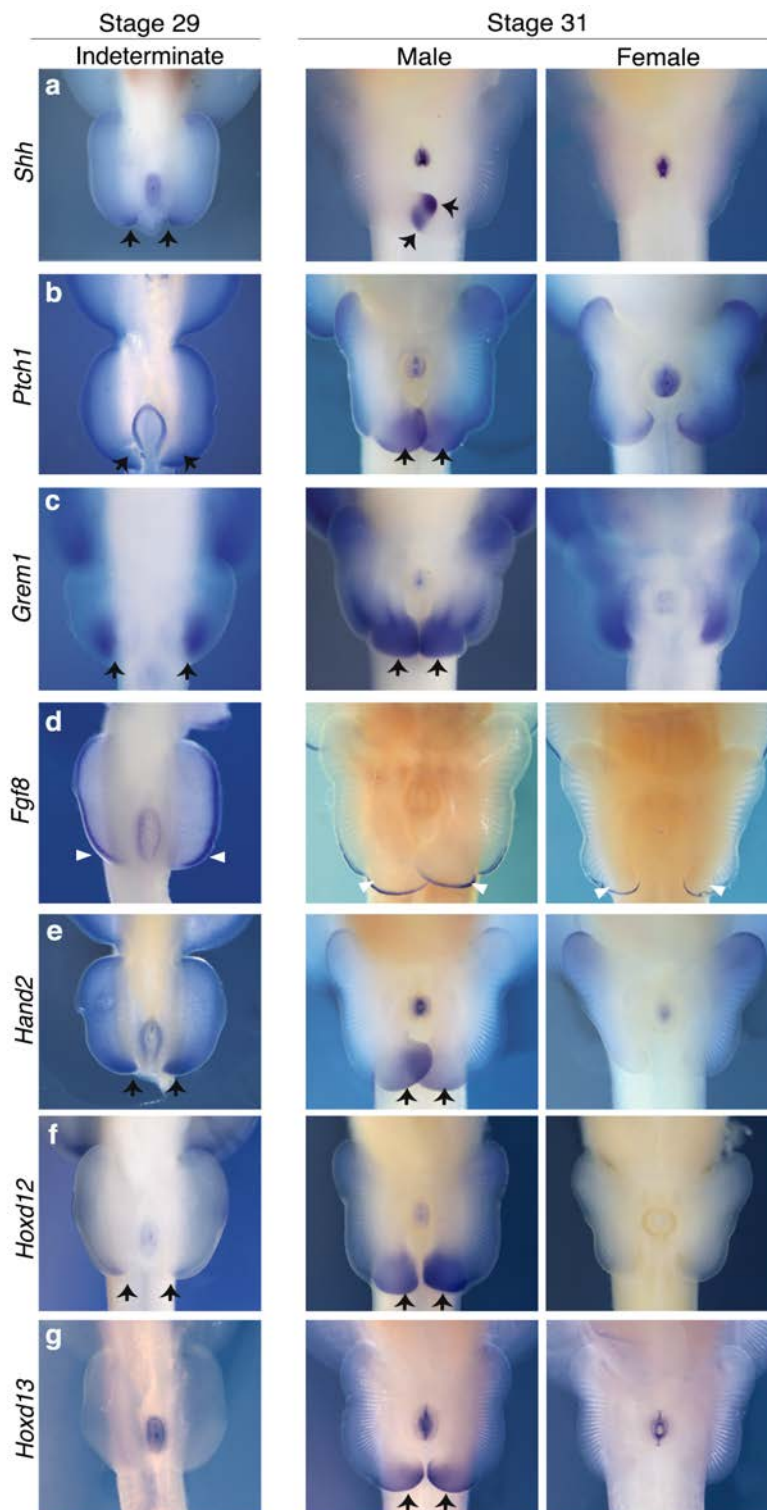

**Supplementary Figure 3: Sexually dimorphic expression of genes in the fin development circuit. a-g,** *In situ* hybridization of developing pelvic fins at stage 29, before sexual differentiation, and in clasper buds at stage 31. Black arrows mark mesenchymal expression and white arrows denote epithelial expression.

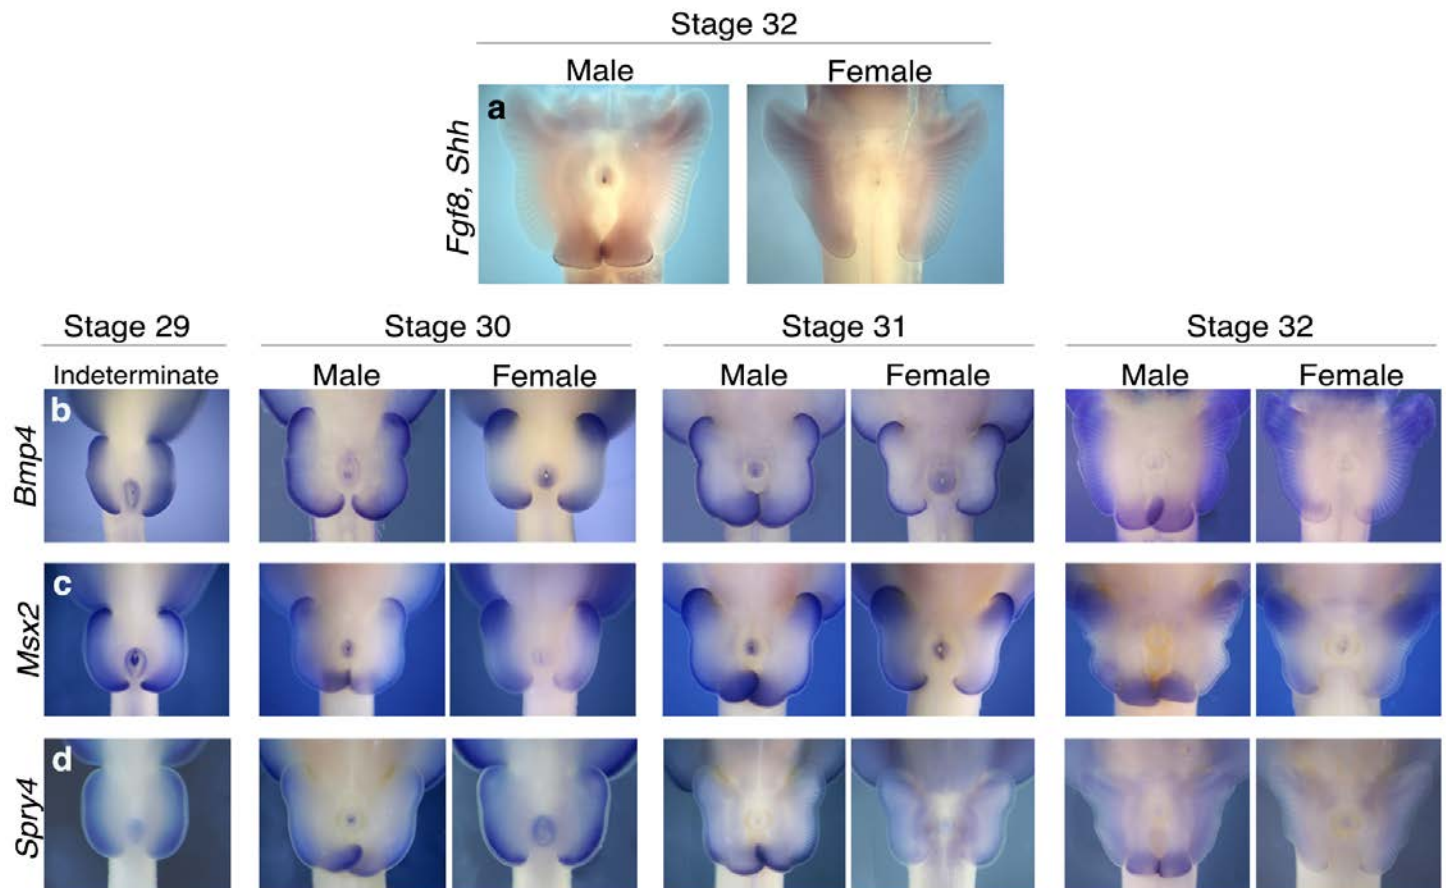

**Supplementary Figure 4: The *Shh/Fgf8* feedback loop at stage 32 and *Bmp4*, *Msx2*, and *Spry4* expression patterns from stages 29-32. **a**, Double *in situ* hybridization in stage 32 male and female pelvic fins. *Shh* is present in the posterior margin of the male clasper bud but is undetectable in female fins; *Fgf8* is restricted to the apical ectoderm overlying the *Shh* domain in males. **b**, *In situ* hybridization of *Bmp4* show sexually dimorphic expression in the epithelium and mesenchyme of male claspers beginning at stages 31. **c**, *Msx2*, the downstream effector of *Bmp4*, is also sexually dimorphic beginning at stage 31. **d**, *Spry4*, a readout of Fgf signaling, shows strong posterior staining in the male clasper from stage 31. This is consistent with the timing of sexual dimorphism of *Fgf8* expression (see Supplementary Figure 3d).**

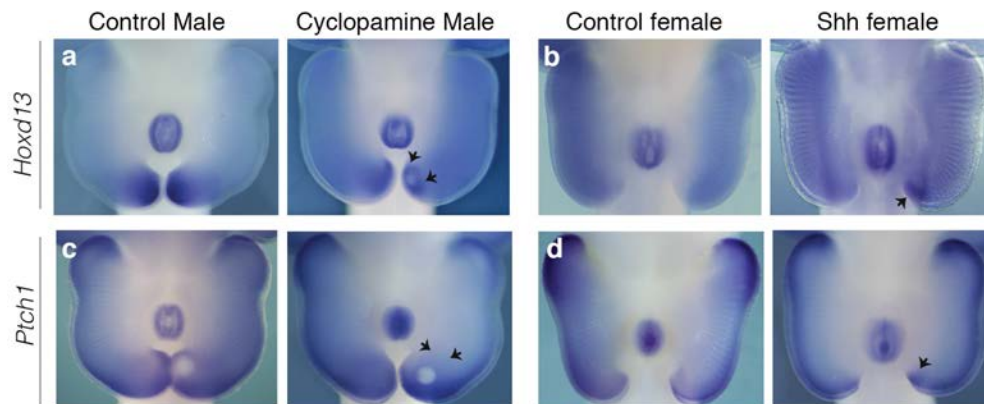

**Supplementary Figure 5: Who mount *in situ* hybridizations of pelvic fins after implantation of cyclopamine or SHH beads. (a, b)** The *Hoxd13* expression domain was reduced around the cyclopamine bead in male fins (a) and was upregulated around the SHH bead in female fins (b). **(c, d)** The *Ptch1* expression domain became more posteriorly restricted in male fins receiving a cyclopamine bead (c) and showed anterior expansion in female fins receiving SHH beads (d). Spatial changes in gene expression domains are subtle but consistent; quantitative changes in gene expression levels, as detected by qRT-PCR, are striking and significant (Figure 3).

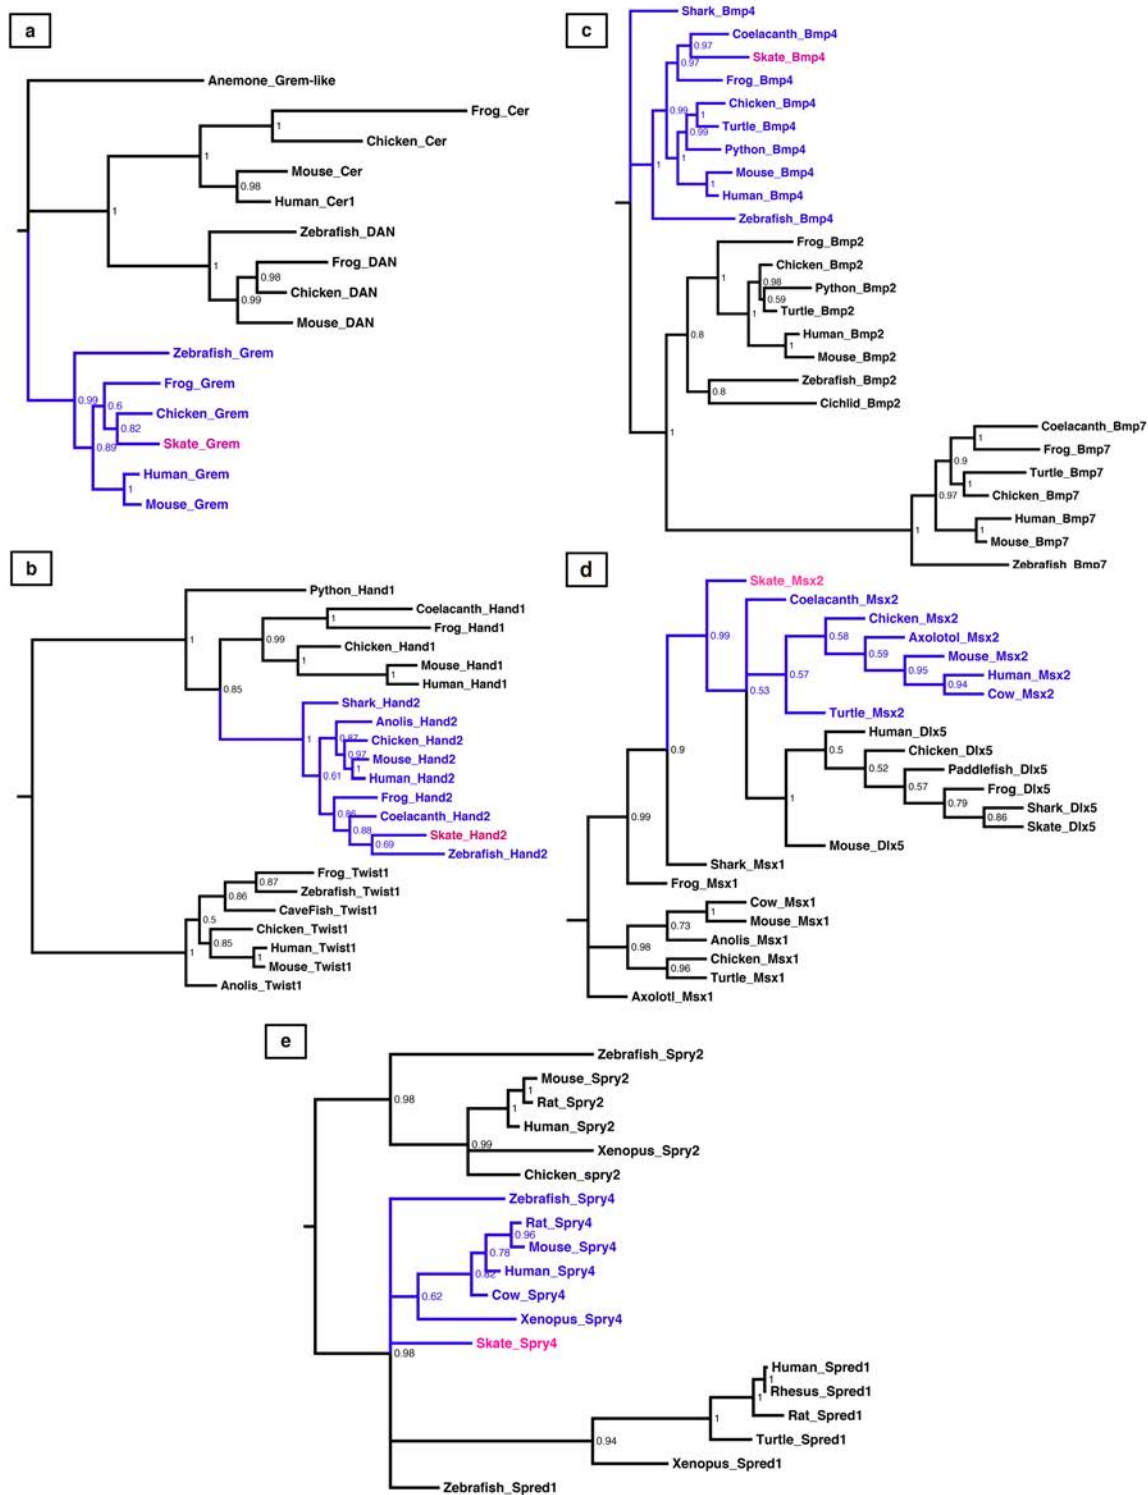

**Supplementary Figure 6: Gene trees produced by Bayesian phylogenetic analyses of *Leucoraja erinacea* sequences.** a-e, Nucleotide trees of *Grem1* (a), *Hand2* (b), *Bmp4* (c), *Msx2* (d), and *Spry4* (e) confirm the identity of *L. erinacea* orthologs. Bayesian phylogenetic analyses used the GTR+G nucleotide substitution model, with calculated posterior probabilities indicated at each node. The skate sequence is highlighted in pink; purple denotes orthologs in other vertebrates.

**Supplementary Table 1: Table comparing developmental stages, ages, and fin morphology in *L. erinacea*.** Note that days reflect development at ambient temperature.

| Stage     | Age (in days) | Fin morphology                |
|-----------|---------------|-------------------------------|
| 29        | 60-70         | Sexually indeterminate        |
| 30        | 71-80         | Clasper initiation            |
| 31        | 81-95         | Clasper bud visible           |
| 32        | 96-110        | Continued clasper outgrowth   |
| 33        | 111-124       | Embryonic patterning complete |
| Hatchling | ~168          |                               |

**Supplementary Table 2: qRT-PCR primers utilized in this study.**

| Gene             | Forward                         | Reverse                         |
|------------------|---------------------------------|---------------------------------|
| <i>GAPDH</i>     | 5'-TGGGGCGATTCAGGAGCCCA-3'      | 5'-CGGGGCATCGGCACTTGGAG-3'      |
| <i>RPL8 (L8)</i> | 5'-TGTGCTGTTTGGAGGAGAAG-3'      | 5'-GGATTGTGGGAGATGACTGTA-3'     |
| <i>Shh</i>       | 5'-ACAAGCAATTCATCCCGAACGTGG-3'  | 5'ATCAGCCTGTCAGCTCCCGTATTT-3'   |
| <i>Ptch1</i>     | 5'-GTTTCTGGCCTGTTGTCTGCCTTGT-3' | 5'-ATGCTGCCTCCCAAGCGAACATT-3'   |
| <i>Hand2</i>     | 5'-TGCGGGATGTTGGAAGAAA-3'       | 5'-AAAGGAGGAACGGGAGAATAAC-3'    |
| <i>Hoxd12</i>    | 5'-CGACAGGCTAAACCTGAGCGACC-3'   | 5'-GCGTTTGTTCGCGCATAACAAGTCT-3' |
| <i>Hoxd13</i>    | 5'-GAGTGCTGAAATGACCCAAAT-3'     | 5'-GAGACAGAGGGAAGGTTACAAAG-3'   |
| <i>Fgf8</i>      | 5'-GCATGAACAAGCGAGGAAAG-3'      | 5'-TGCAGTGCCGTGTAGTTATT-3'      |
| <i>Fgfr2</i>     | 5'-GGTGAACGTCGCTCTCCGCA-3'      | 5'-GCGCCGGTGGAGTCCGAACAT-3'     |
| <i>Grem1</i>     | 5'-GTTCTGCTATGGCCAGTGTA-3'      | 5'-GACTGTCATGGTGGTGAATCT-3'     |
| <i>Spry4</i>     | 5'-CCGTCTACCGTGTCAAAA-3'        | 5'-GGGACCATGTCTGTGTTCTT-3'      |
| <i>Bmp4</i>      | 5'-GGGAGGTAAGTCTAGTCTGATA-3'    | 5'-GAATTCCCGGAGCAGTTCAT-3'      |
| <i>Msx2</i>      | 5'-CCGAGACTCAGGTGAAGATTTG-3'    | 5'-GGCCGACAGTTTGAGTTTCT-3'      |

**Supplementary Table 3: Sense oligonucleotides used in EMSA.** Underlined portion reflects the androgen response element (ARE) sequence, and lowercase nucleotides represent the variable 3-bp spacer.

|                  | EMSA Sense Probe                                         |
|------------------|----------------------------------------------------------|
| Skate Hand2-ARE1 | 5bio'-AGACGTGTTG <u>AGGCCA</u> accAGTCCGTCCTTTGTCTT-3'   |
| Mouse Hand2-ARE1 | 5bio'-AGACGTGCTGTGGCCAgccTGTCCGGCCTTTGGTTTT-3'           |
| Skate Hand2-ARE2 | 5bio'- TATTGACAATA <u>AATTACA</u> acgTTTACATCTCCAATAT-3' |
| Mouse Hand2-ARE2 | 5bio'-TATTGAATACTTACAatgTTTACACCTTCAATA-3'               |
